# Supplementary material for: Determinants of Proactive Low-Carbon Consumption Behaviors: Insights from Urban Residents in Eastern China
Source: MDPI journal article supplement (doi:10.3390/ijerph19106307), 2022-05-23
Supplement: s1 [file s1]

**Table S1.** Measurement items of variables, reliability, and validity analysis.

| Measurement Items                                                                              | Cronbach's $\alpha$ | KMO   | Factor Loading | CR    | AVE   |
|------------------------------------------------------------------------------------------------|---------------------|-------|----------------|-------|-------|
| <b>Proactive Low-carbon Consumption Behaviors (PLCBs)</b>                                      |                     |       |                |       |       |
| I am used to turning off the lights when leaving the room.                                     |                     |       |                |       |       |
| It is my habit to bring shopping bags when going to the supermarket.                           |                     |       |                |       |       |
| I have developed the habit of checking carbon labels when buying products.                     |                     |       |                |       |       |
| I give priority to purchasing energy-saving home appliances because they can save money.       |                     |       |                |       |       |
| I prioritize using renewable and recycled items because they are suitable for the environment. |                     |       |                |       |       |
| I prioritize riding when going out because it is beneficial to my health.                      | 0.765               | 0.773 | 0.812          | 0.774 | 0.536 |
| I always encourage my family to save energy.                                                   |                     |       |                |       |       |
| I always encourage my colleagues to buy new energy vehicles instead of fuel vehicles.          |                     |       |                |       |       |
| I buy energy-saving appliances because the people around me buy them.                          |                     |       |                |       |       |
| I actively participate in low-carbon-related actions held by the community.                    |                     |       |                |       |       |
| I provide advice for the government to save electricity and water.                             |                     |       |                |       |       |
| I will report to the community when I observe some wasting water in the living district.       |                     |       |                |       |       |
| <b>Normative internalization (NI)</b>                                                          |                     |       |                |       |       |
| Saving water and electricity is what I should do well.                                         |                     |       |                |       |       |
| I will save energy even if there is no supervision.                                            | 0.843               | 0.851 | 0.872          | 0.757 | 0.522 |
| I will feel guilty if I buy energy-consuming appliances.                                       |                     |       |                |       |       |
| <b>Learning capacity (LC)</b>                                                                  |                     |       |                |       |       |
| I refer to experience when buying home appliances.                                             |                     |       |                |       |       |
| I broaden my knowledge of low-carbon consumption in various ways.                              | 0.876               | 0.817 | 0.807          | 0.757 | 0.515 |
| I can correct my understanding of low-carbon consumption.                                      |                     |       |                |       |       |
| <b>Symbol concern (SC)</b>                                                                     |                     |       |                |       |       |
| I can express my personality by practicing low-carbon consumption behaviors.                   | 0.786               | 0.802 | 0.834          | 0.792 | 0.563 |

| Measurement Items                                                                            | Cronbach's $\alpha$ | KMO   | Factor Loading | CR    | AVE   |
|----------------------------------------------------------------------------------------------|---------------------|-------|----------------|-------|-------|
| Practicing low-carbon consumption behaviors improve others' impression of me.                |                     |       |                |       |       |
| Practicing low-carbon consumption behaviors demonstrates social status.                      |                     |       |                |       |       |
| Practicing low-carbon consumption behaviors enable me to gain a higher social reputation.    |                     |       |                |       |       |
| <b>Expertise level (EL)</b>                                                                  |                     |       |                |       |       |
| People around me know a lot about the low-carbon consumption guiding policy.                 | 0.845               | 0.756 | 0.821          | 0.787 | 0.518 |
| Professionals with low-carbon-related knowledge surround me.                                 |                     |       |                |       |       |
| People around me have unique views on low-carbon-related policies and behaviors.             |                     |       |                |       |       |
| <b>Consumerism culture (CC)</b>                                                              |                     |       |                |       |       |
| It is widespread that people consume goods and services in large quantities.                 | 0.837               | 0.826 | 0.789          | 0.802 | 0.521 |
| It is widespread that people consume luxury goods and services.                              |                     |       |                |       |       |
| It is widespread to observe over-consumption.                                                |                     |       |                |       |       |
| <b>Environmentalism culture (EC)</b>                                                         |                     |       |                |       |       |
| Many people pay attention to emissions reduction and energy saving.                          | 0.842               | 0.805 | 0.806          | 0.788 | 0.547 |
| A lot of people attach great importance to conserving energy.                                |                     |       |                |       |       |
| Many people have made efforts to change their behaviors to protect the environment.          |                     |       |                |       |       |
| <b>Psychological empowerment perception (PEP)</b>                                            |                     |       |                |       |       |
| I think it makes sense to practice low-carbon consumption behaviors.                         | 0.794               | 0.803 | 0.779          | 0.792 | 0.564 |
| I think it is pivotal to practice low-carbon consumption behaviors.                          |                     |       |                |       |       |
| I think it is necessary to practice low-carbon consumption behaviors.                        |                     |       |                |       |       |
| I can well practice low-carbon consumption behaviors.                                        |                     |       |                |       |       |
| I have the confidence to practice low-carbon consumption behaviors.                          |                     |       |                |       |       |
| It would be helpful to persuade others to practice low-carbon consumption behaviors.         |                     |       |                |       |       |
| I have autonomy in how to practice low-carbon consumption behaviors.                         |                     |       |                |       |       |
| I can decide how to persuade others to practice low-carbon consumption behaviors.            |                     |       |                |       |       |
| I have the right to decide whether to report the people violating low-carbon-related policy. |                     |       |                |       |       |

| Measurement Items                                                                          | Cronbach's $\alpha$ | KMO | Factor Loading | CR | AVE |
|--------------------------------------------------------------------------------------------|---------------------|-----|----------------|----|-----|
| Practicing low-carbon consumption behaviors can improve the living environment.            |                     |     |                |    |     |
| I can persuade people around me to practice low-carbon consumption behaviors.              |                     |     |                |    |     |
| My suggestions on low-carbon consumption behaviors can get the response of the government. |                     |     |                |    |     |
